# Supplementary material for: Bimetallic electronic effects of Mn-doped Ni-MOF shuttle-like nanosheets remarkably enhance the supercapacitive performance
Source: Royal Society of Chemistry journal article supplement (doi:10.1039/d2qi01700h), 2022-01-01
Supplement: d2qi01700h1.pdf [file d2qi01700h1.pdf]

## Supporting Information

### **Bimetallic electronic effects of Mn-doped Ni-MOFs shuttle-like nanosheets remarkably enhance supercapacitive performance**

Yifan Pan<sup>a</sup>, Dongyan Gao<sup>a</sup>, Yupeng Dang<sup>a</sup>, Pengcheng Xu<sup>a</sup>, Dandan Han<sup>a,\*</sup>, Changling Liu<sup>a</sup>, Yen Wei<sup>b,\*</sup> and Yanru Yang<sup>a</sup>

<sup>a</sup> *College of Biology & Food Engineering, Jilin Institute of Chemical Technology, Jilin 132022, China*

<sup>b</sup> *Department of Chemistry and the Tsinghua Center for Frontier Polymer Research, Tsinghua University, Beijing, 100084, China*

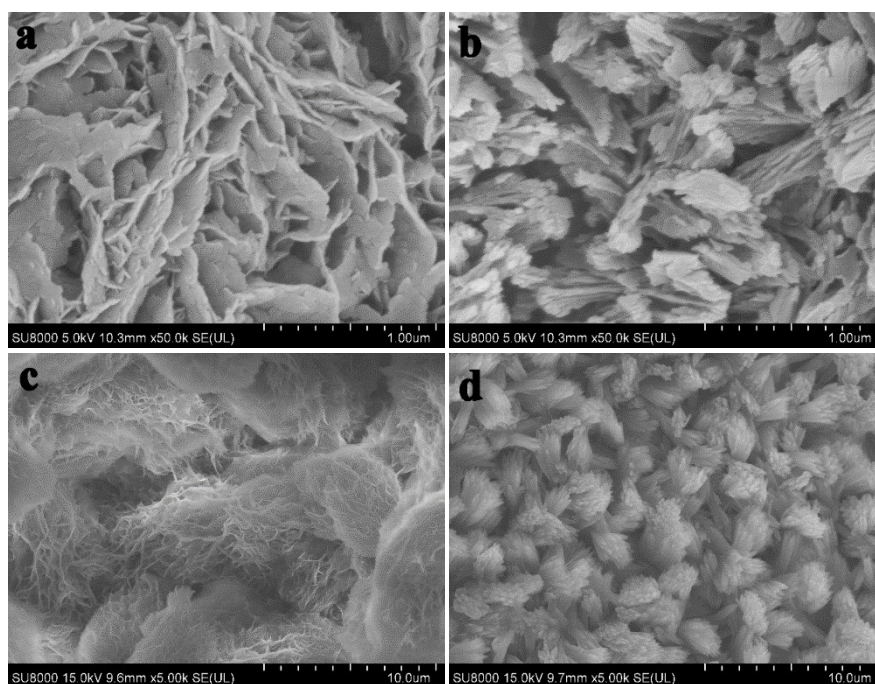

**Figure S1.** SEM images of (a) Ni<sub>0.9</sub>Mn<sub>0.1</sub>-MOF, (b) Ni<sub>0.4</sub>Mn<sub>0.6</sub>-MOF, (c) Ni-MOF and (d) Mn-MOF nanostructures

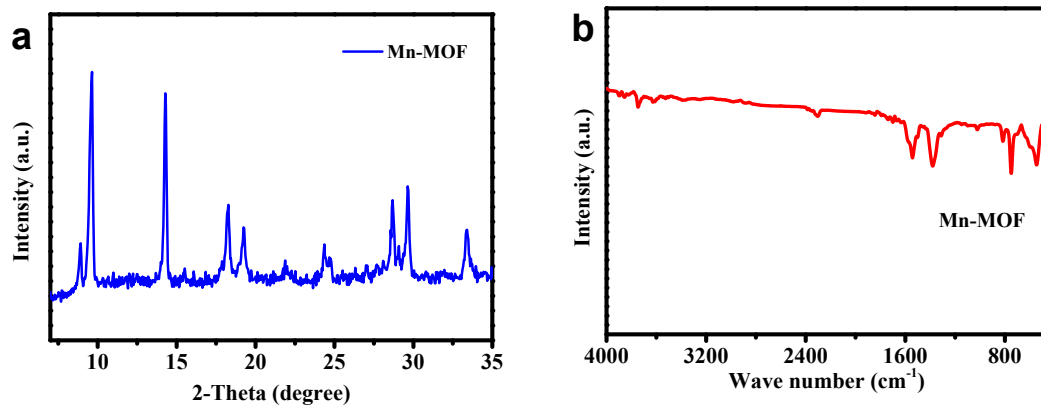

**Figure S2.** (a) XRD patterns, (b) FT-IR spectra of Mn-MOF.

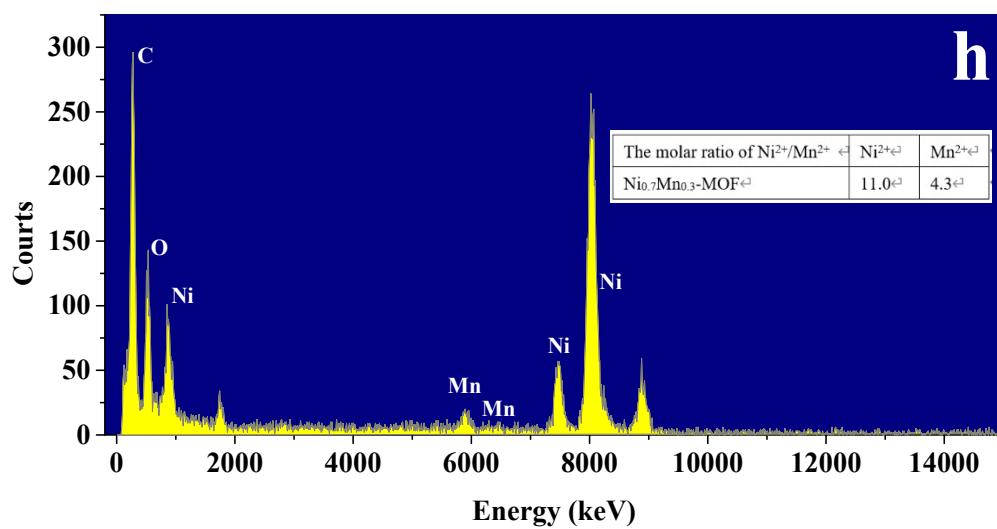

**Figure S3.** EDS mapping of the Ni<sub>0.7</sub>Mn<sub>0.3</sub>-MOF. The insert is the molar ratio of the Ni<sup>2+</sup> and Mn<sup>2+</sup>

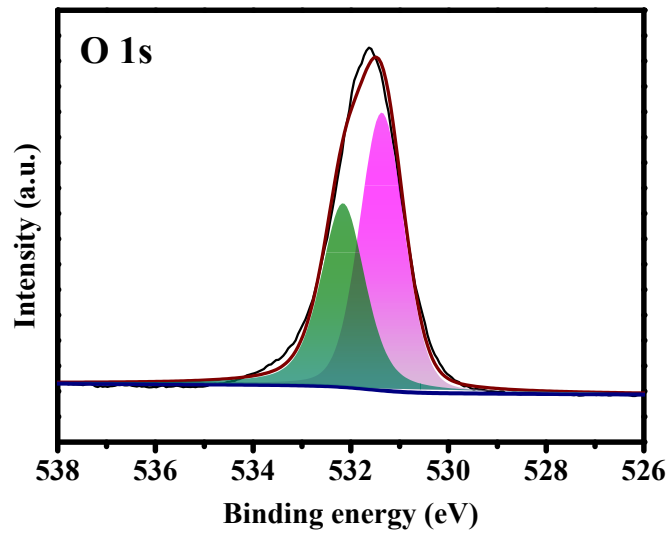

**Figure S4.** High-resolution XPS spectra for the Ni<sub>0.7</sub>Mn<sub>0.3</sub>-MOF in O 1s

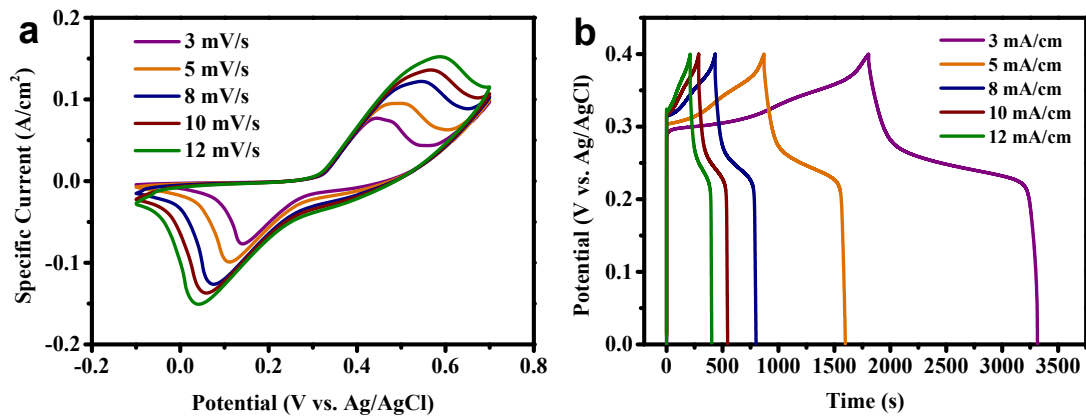

**Figure S5.** The electrochemical performance of the Ni-MOF electrode in 2 M KOH electrolyte: (a) CV curves, (b) GCD curves.

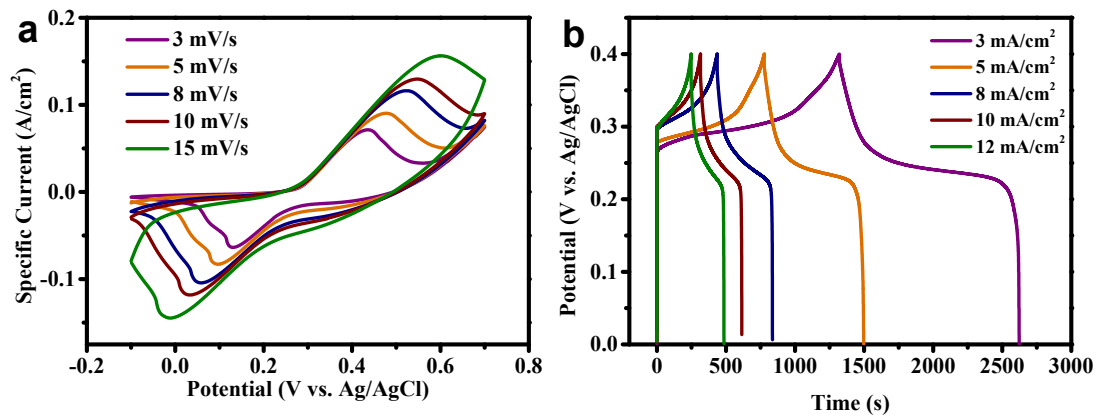

**Figure S6.** The electrochemical performance of the Ni<sub>0.4</sub>Mn<sub>0.6</sub>-MOF electrode in 2 M KOH electrolyte: (a) CV curves, (b) GCD curves.

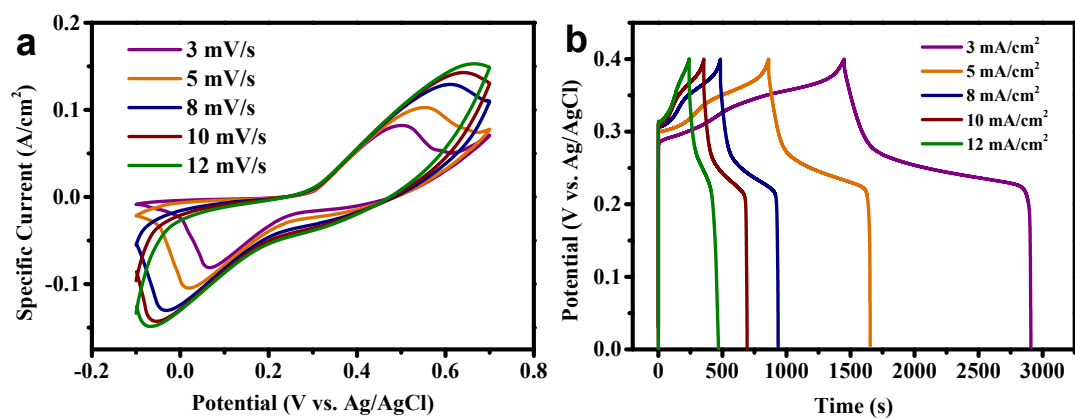

**Figure S7.** The electrochemical performance of the  $\text{Ni}_{0.9}\text{Mn}_{0.1}\text{-MOF}$  electrode in 2 M KOH electrolyte: (a) CV curves, (b) GCD curves.

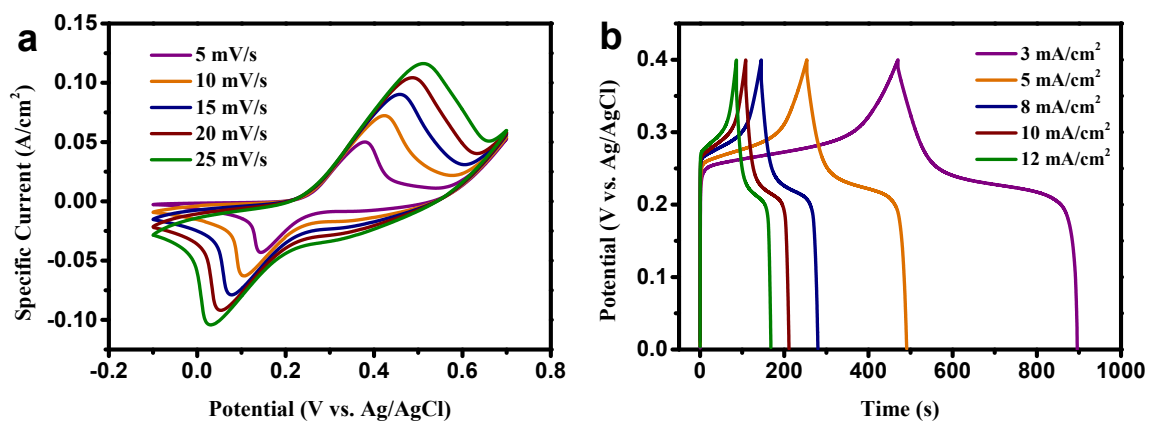

**Figure S8.** The electrochemical performance of the Mn-MOF electrode in 2 M KOH electrolyte: (a) CV curves, (b) GCD curves.



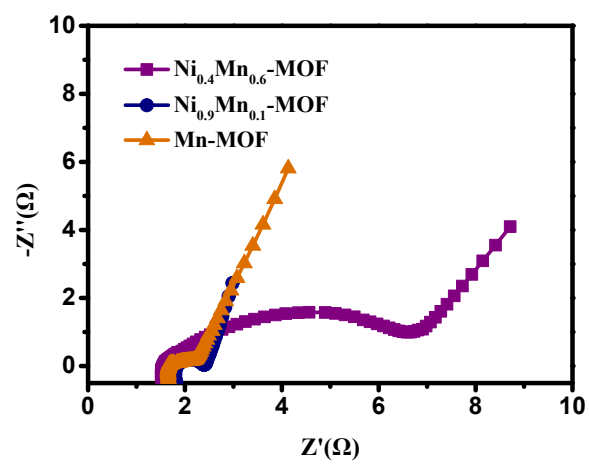

**Figure S9.** EIS curves of the Ni<sub>0.4</sub>Mn<sub>0.6</sub>-MOF, Ni<sub>0.9</sub>Mn<sub>0.1</sub>-MOF and Mn-MOF.

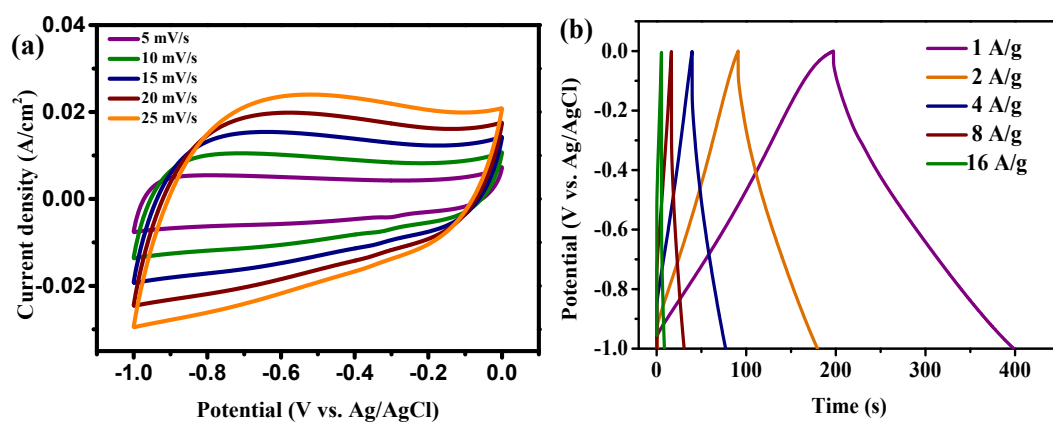

**Figure S10.** The electrochemical performance of the NF/AC electrode in 2 M KOH electrolyte: (a) CV curves, (b) GCD curves.

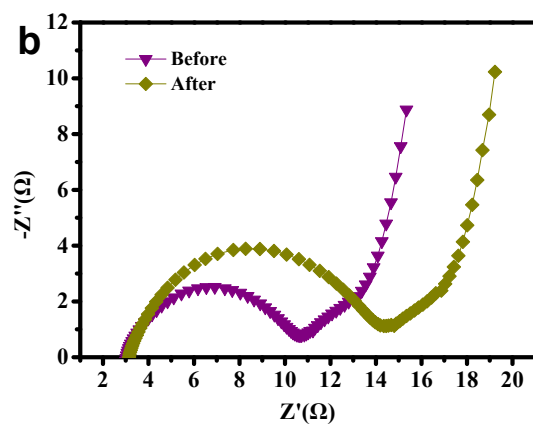

**Figure S11.** EIS curves of the NF/Ni<sub>0.7</sub>Mn<sub>0.3</sub>-MOF//AC HSC device before and after 10000 cycles.

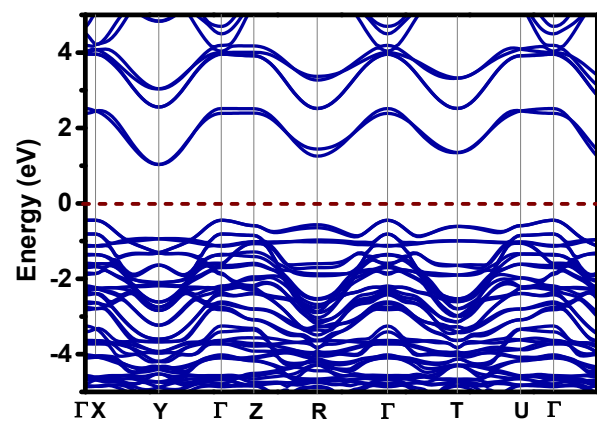

**Figure S12.** Calculated the energy band curve of Ni-MOFs.

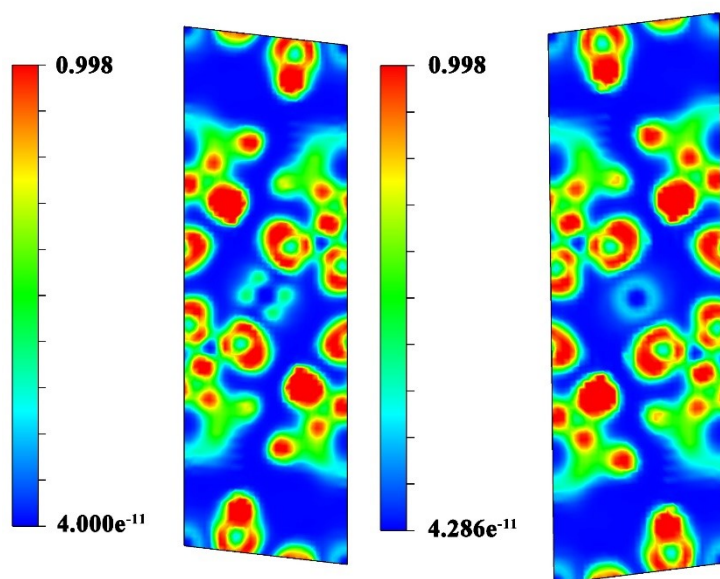

**Figure S13.** Calculated the electron localization density function plot.

## References:

- [S1] C. Qu, B. Zhao, Y. Jiao, D. C. Chen, S. G. Dai, B. M. Deglee, Y. Chen, K. S. Walton, R. Q. Zou and M. L. Liu, Functionalized bimetallic hydroxides derived from metal-organic frameworks for high-performance hybrid supercapacitor with exceptional cycling stability, *ACS Energy Lett.*, 2017, **2**, 1263-1269.
- [S2] J. Yang, C. Zheng, P. X. Xiong, Y. F. Li and M. D. Wei, Zn-doped Ni-MOF material with a high supercapacitive performance, *J. Mater. Chem. A*, 2014, **2**, 19005-19010.
- [S3] J. Wang, Q. Zhong, Y. Q. Zeng, D. Y. Cheng, Y. H. Xiong and Y. F. Bu, Rational construction of triangle-like nickel-cobalt bimetallic metal-organic framework nanosheets arrays as battery-type electrodes for hybrid supercapacitors, *J. Colloid Interface Sci.*, 2019, **555**, 42-52.
- [S4] Y. Seo, P. A. Shinde, S. Park and S. C. Jun, Self-assembled bimetallic cobalte-manganese metale organic framework as a highly efficient, robust electrode for asymmetric supercapacitors, *Electrochim. Acta*, 2020, **335**, 135327.
- [S5] P. A. Shinde, Y. Seo, S. Lee, H. S. Kim, Q. N. Pham, Y. Won and S. C. Jun, Layered manganese metal-organic framework with high specific and areal capacitance for hybrid supercapacitors, *Chem. Eng. J.*, 2020, **387**, 122982.
- [S6] P. C. Du, Y. M. Dong, C. Liu, W. L. Wei, D. Liu and P. Liu, Fabrication of hierarchical porous nickel based metal-organic framework (Ni-MOF) constructed with nanosheets as novel pseudo-capacitive material for asymmetric supercapacitor, *J. Colloid Interface Sci.*, 2018, **518**, 57-68.
- [S7] Q. Bi, Q. X. Ma, K. Tao and L. Han, Hierarchical core-shell 2D MOF nanosheet hybrid arrays for high-performance hybrid supercapacitors, *Dalton Trans.*, 2021, **50**, 8179.
- [S8] L. L. Lei, X. C. Zhang, Y. T. Su, S. S. Wu and J. Shen, Metal-organic framework (MOF)-assisted construction of core-shell nanoflower-like CuO/CF@NiCoMn-OH for high-performance supercapacitor, *Energy Fuels*, 2021, **35**, 8387-8395.
- [S9] J. Wang, Q. Zhong, Y. H. Xiong, D. Y. Cheng, Y. Q. Zeng and Y. F. Bu, Fabrication of 3D Co-doped Ni-based MOF hierarchical micro-flowers as a high-performance electrode material for supercapacitors, *Appl. Surf. Sci.*, 2019, **483**, 1158-1165.
- [S10] Y. Jiao, J. Pei, D. H. Chen, C. S. Yan, Y. Y. Hu, Q. Zhang and G. Chen, Mixed-metallic MOF based electrode materials for high performance hybrid supercapacitors, *J. Mater. Chem. A*, 2017, **5**, 1094-1102.

[S11] Y. D. Zhang, B. P. Lin, Y. Sun, X. Q. Zhang, H. Yang and J. C. Wang, Carbon nanotubes@metal-organic frameworks as Mn-based symmetrical supercapacitor electrodes for enhanced charge storage, *RSC Adv.*, 2015, **5**, 58100-58106.
